# Supplementary material
Source: Springer Nature journal article supplement (https://www.springermedizin.de/resource/supplementary/12890_2013_483_MOESM6_ESM.pdf/9505586)

**Fig. 3-A: Cumulative survival after diagnosis of secondary PAP with or without steroid therapy in patients with MDS (n=31)**

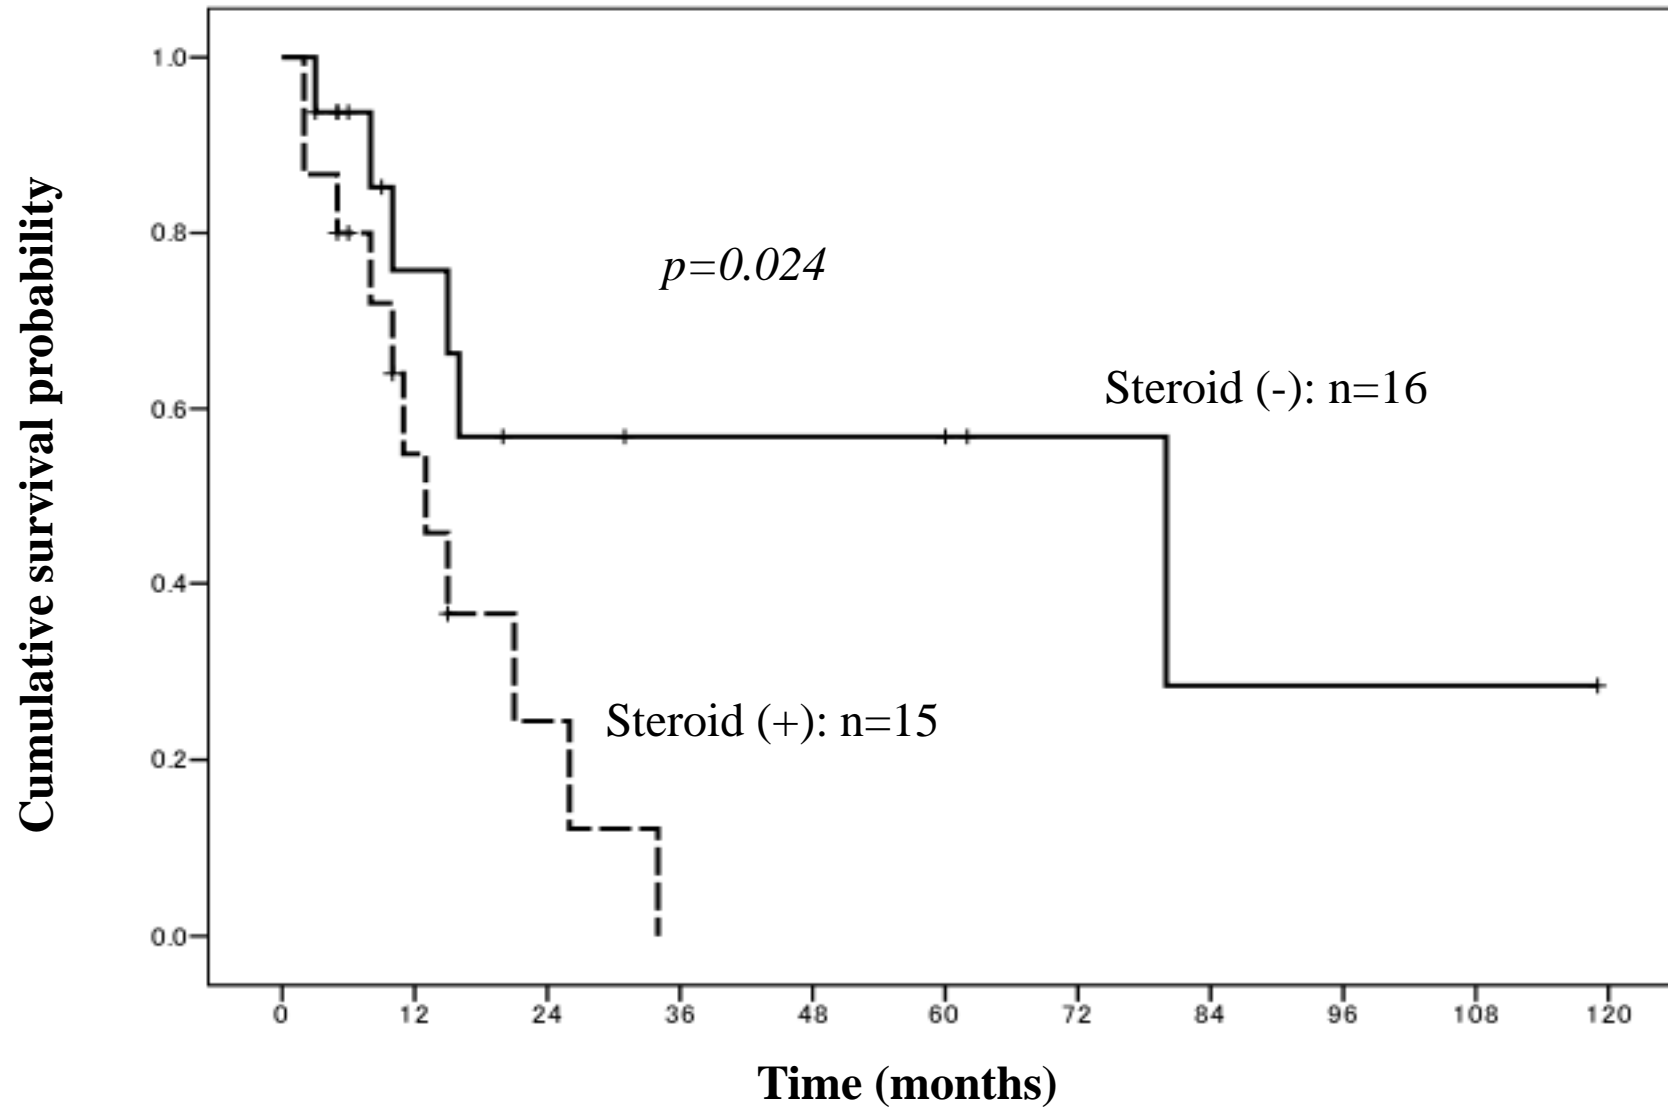

Supplement: MOESM6 [file 9505586]
